# Supplementary material
Source: PubMed Central journal article supplement (PMC4308666)

### Exome

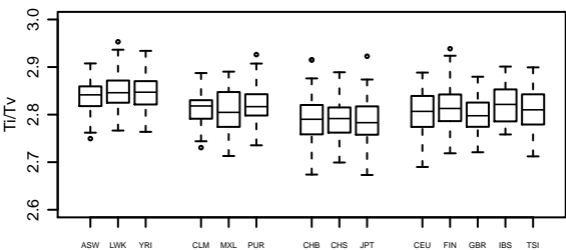

### Intron

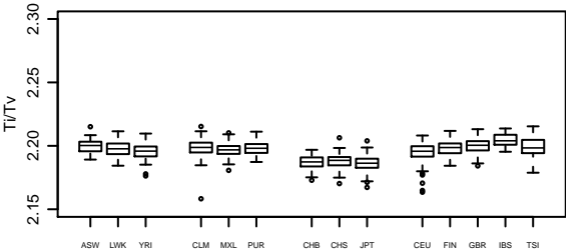

### Intergenic

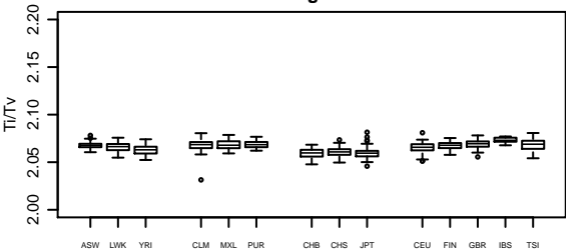

### lncRNA

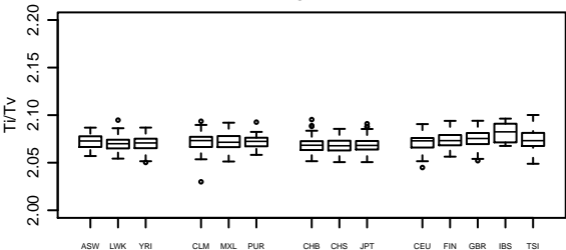

### miRNA

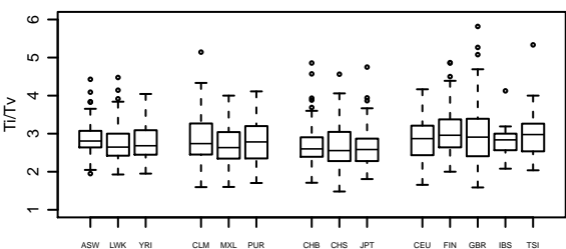

Ancestry

Supplement: supp_btu668_FigS4.pdf [file supp_btu668_FigS4.pdf]

## Exome

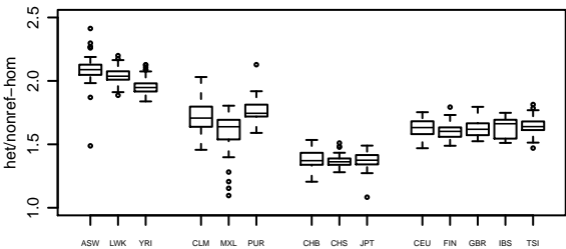

## Intron

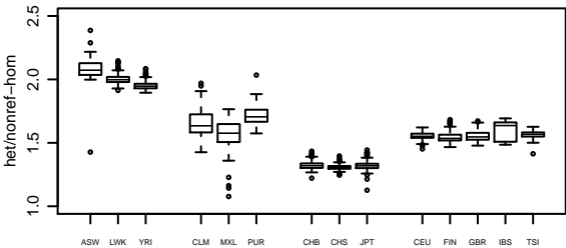

## Intergenic

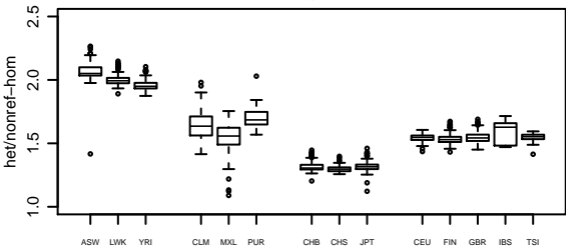

## lncRNA

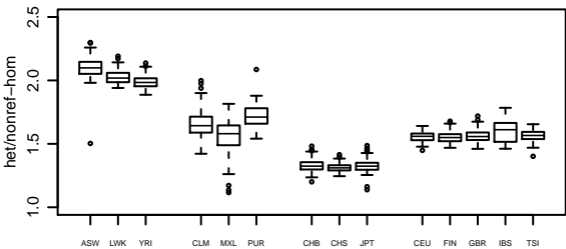

## miRNA

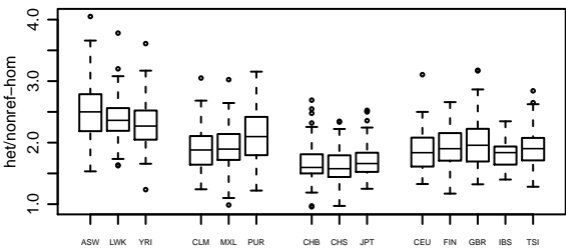

Ancestry

Supplement: supp_btu668_FigS5.pdf [file supp_btu668_FigS5.pdf]

synonymous

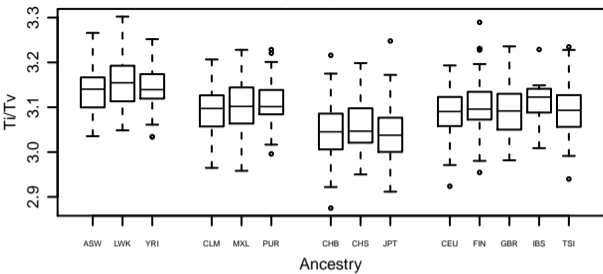

non-synonymous

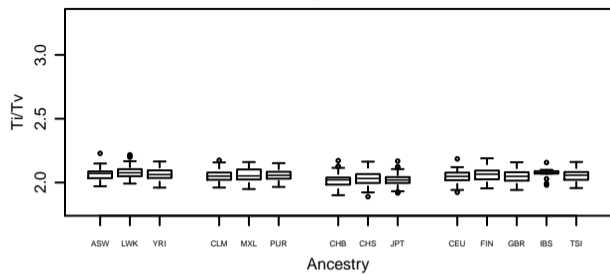

synonymous

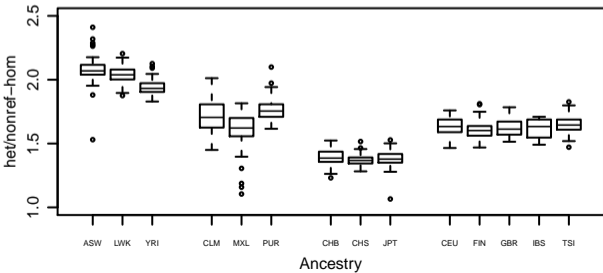

non-synonymous

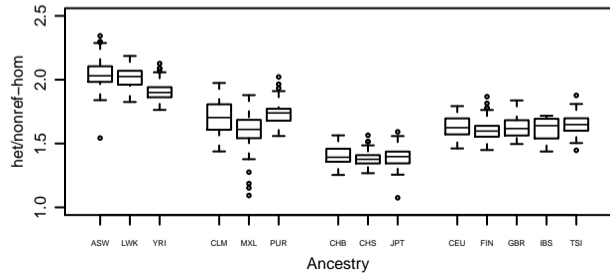

Supplement: supp_btu668_FigS6.pdf [file supp_btu668_FigS6.pdf]

### Exome

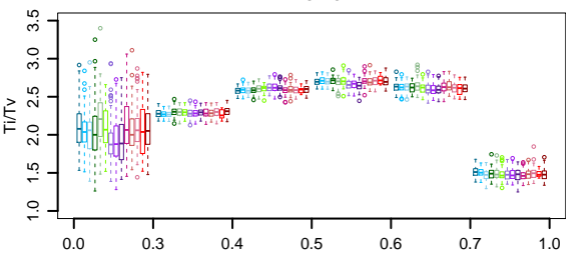

### Intron

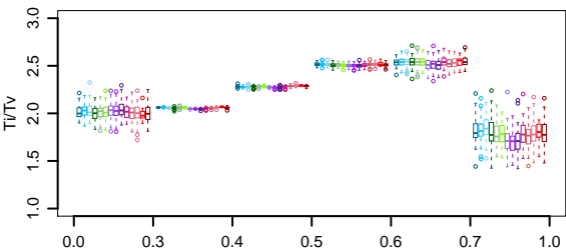

### Intergenic

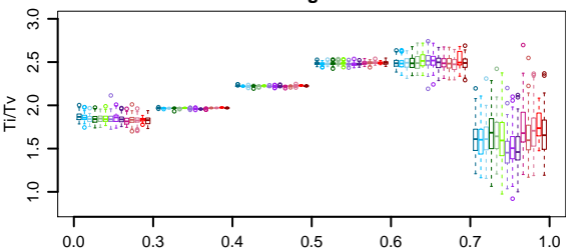

### lncRNA

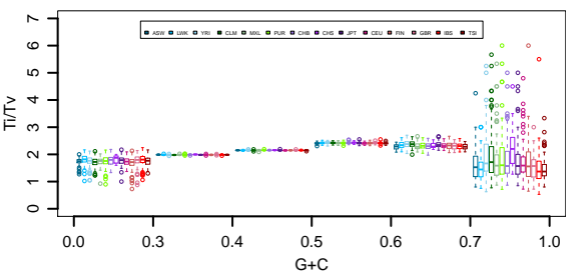

Supplement: supp_btu668_FigS7.pdf [file supp_btu668_FigS7.pdf]

### Exome

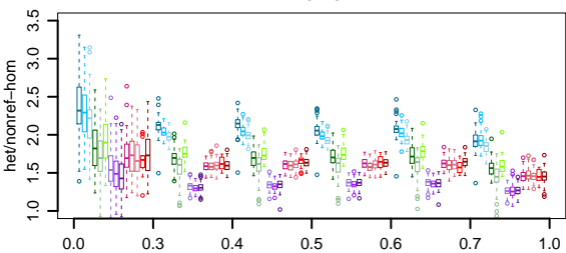

### Intron

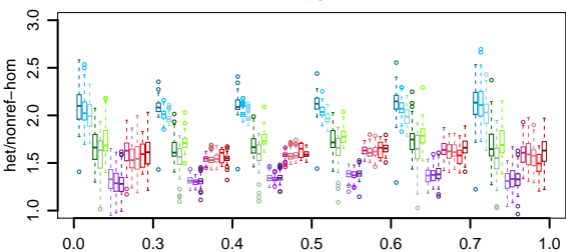

### Intergenic

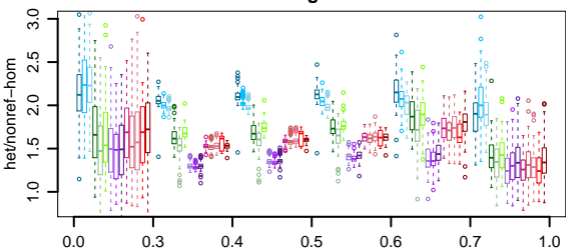

### lncRNA

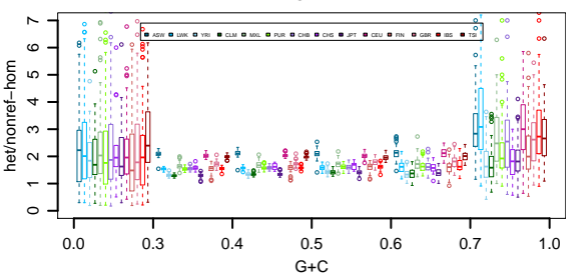

Supplement: supp_btu668_FigS8.pdf [file supp_btu668_FigS8.pdf]

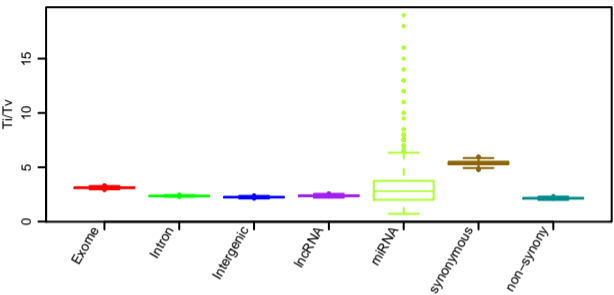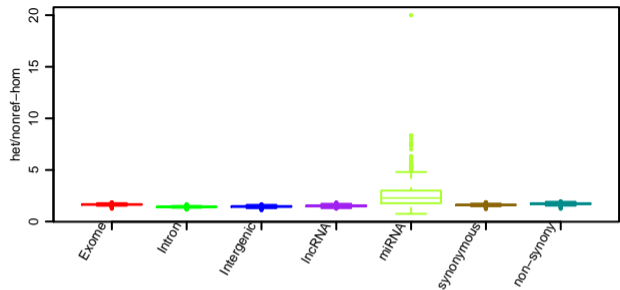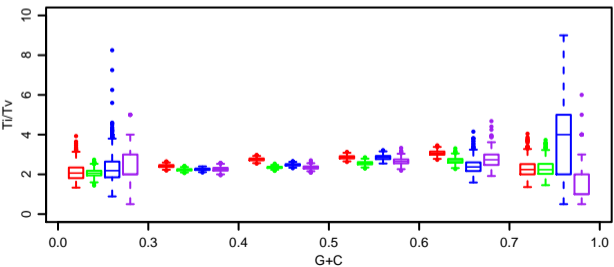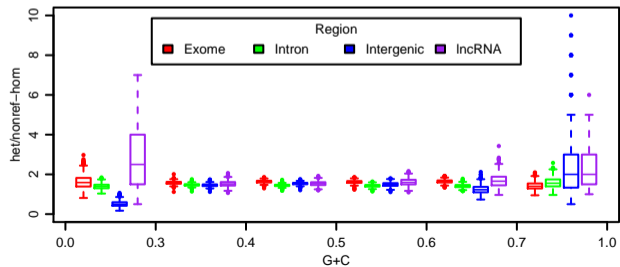

Supplement: supp_btu668_FigureS2.pdf [file supp_btu668_FigureS2.pdf]

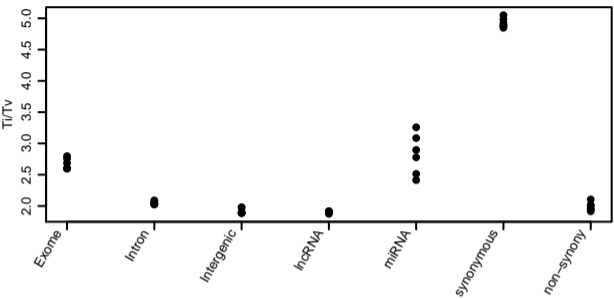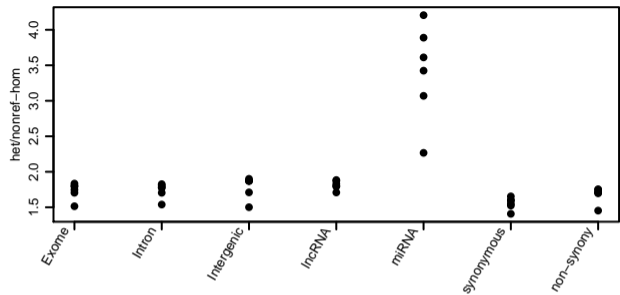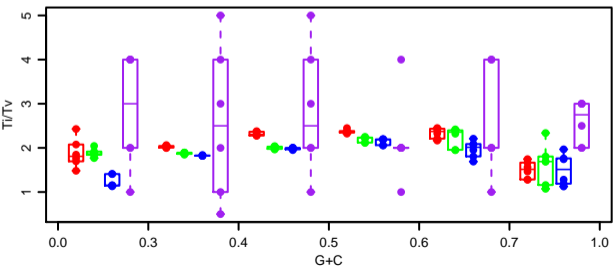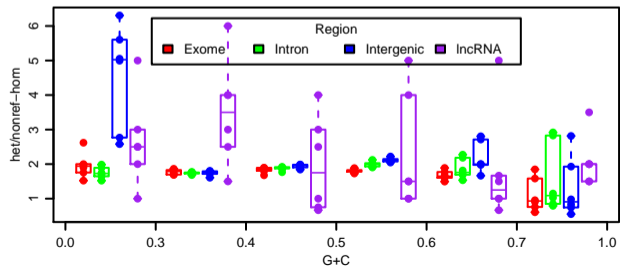

Supplement: supp_btu668_FigureS3.pdf [file supp_btu668_FigureS3.pdf]
